# Supplementary material for: Long-term salinity irrigation alters nutritional composition in date palm fruits: implications for variety selection in hyper-arid agriculture
Source: Research Square preprint supplement (doi:10.21203/rs.3.rs-8557607/v1), 2026-02-02
Supplement: Supplementary file 1 [file e241c92fe0b02e5af6cf4452.docx]

**Supplementary Data**

**Table S1:** Two-way analyses of variance (means of squares and their associated probabilities) of the effects of the variety (V), salinity (S) and their interactions (V*S) on protein, total phenols, and sugar contents on date palm fruits

| SV | Df | Protein | Total phenols | Sucrose | Glucose | Fructose | Total sugar | G/F |
| --- | --- | --- | --- | --- | --- | --- | --- | --- |
| Variety (V) | 9.000 | 8.970*** | 201001*** | 5409*** | 1424.400*** | 1696.100*** | 580.600*** | 0.144*** |
| Salinity (S) | 2.000 | 3.249*** | 42657*** | 1.000 | 3.800 | 4.500 | 5.600 | 0.016*** |
| V x S | 18.000 | 2.087* | 35429* | 11.000 | 41.300 | 42.900 | 163.300 | 0.023**.** |
| Residuals | 60.000 | 3.360 | 60358 | 200.000 | 94.300 | 108.600 | 536.000 | 0.044 |

SV: Source of variation; Df: Degree of freedom; Asterisks indicate significance at *P < 0.05, **P < 0.01 and *** P < 0.001, and ns indicates not significant (P > 0.05).

|  |  |
| --- | --- |
| **(A)** | **(B)** |
| **Figure S1:** The contribution of measured traits on extracted principal components based on square cosine and squared coordinates.  Eigenvalues, Eigenvectors and proportion of the variables explained for five principal components. | |
